# Supplementary material
Source: PubMed Central journal article supplement (PMC11029838)

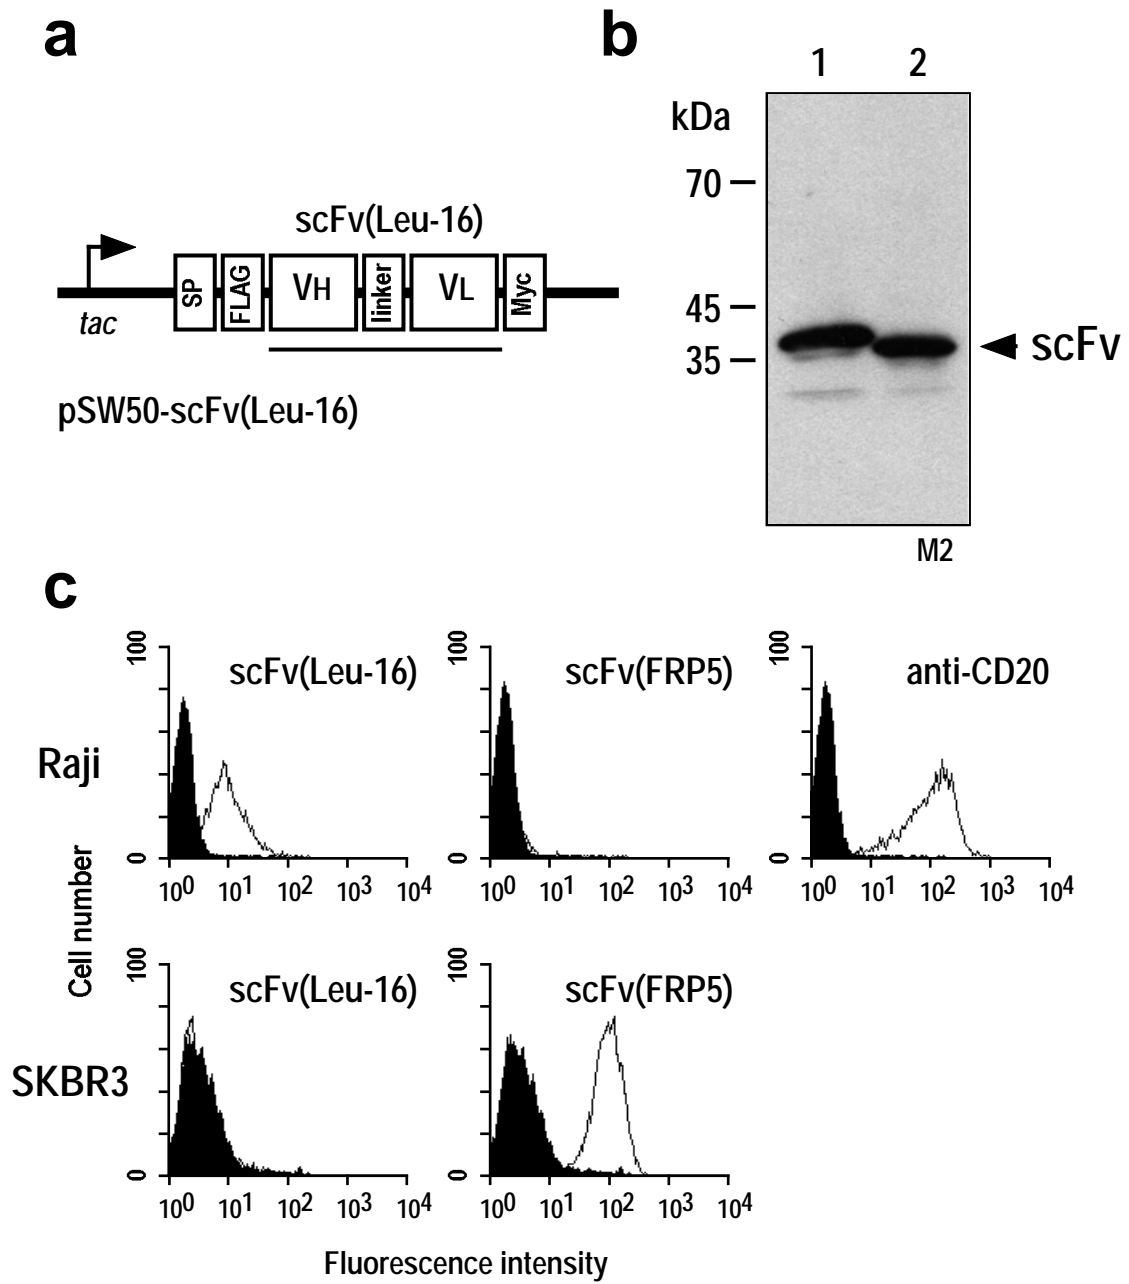

Supplement: 262_2007_383_MOESM1_ESM.pdf [file 262_2007_383_MOESM1_ESM.pdf]
